# Supplementary material
Source: Research Square preprint supplement (doi:10.21203/rs.3.rs-8601712/v1)
Supplement: Supplementary file 1 [file 2fe13a6f77ff0931a4356936.docx]

**Table 1.** Concentrations of metals (µg/g) in coastal sediment samples from India with comparison to established sediment quality guideline values.

| Regions and Guidelines | **Cu** | **Co** | **Mn** | **Cd** | **Zn** | **Ni** | **Pb** | **As** | **Cr** |
| --- | --- | --- | --- | --- | --- | --- | --- | --- | --- |
| East and West coast | 1.7-78.3 (25.2) | 2.1-19.5 (9.3) | 20-1235.8 (368) | 0.8-6.7 (1.9) | 4.8-417.7 (53.7) | 4.6-45.3 (21.3) | 0.4-36 (8.1) | 1.5-11 (6.0) | 13.4-280.9 (84) |
| West Coast of India | 1.7-78.3 (32.3) | 2.05-19.51 (10.63) | 19.9-1235.8 (394.67) | 1.26-6.65 (2.22) | 4.79-417.67 (68.2) | 4.59-45.33 (25.42) | 0.39 -36.0 (8.3) | 1.5 - 9.85 (5.71) | 13.4-280.8 (91.7) |
| East Coast of India | 5.3 - 23.2 (13.5) | 4.46-10.85 (7.17) | 145.1-590 (324.42) | 0.76-5.06 (1.33) | 15.2-71.39 (29.78) | 6.56 - 25.6 (14.47) | 3.72 - 12.5 (7.76) | 3.79 - 10.98 (6.5) | 27.7-92.7 (57.6) |
| Australian Interim Sediment Quality Guidelinesᵃ | 6.3 - 55.6 | 3.2 - 38.6 | 232 - 3260 | 0.02 - 0.16 | 26.4 - 100 | 4.5 - 92.9 | 2.8 - 18.7 | 0.5 - 5.7 | 8.3 - 118 |
| ERLᵇ | 70 | - | - | 5 | 120 | 30 | 35 | 33 | 80 |
| ERMᵇ | 390 | - | - | 9 | 270 | 50 | 110 | 85 | 145 |
| TRVᶜ | 16 | - | - | 0.6 | 110 | 16 | 31 | 6 | 26 |
| WSAᵈ | 32 | - | - | 0.3 | 129 | 49 | 20 | - | 97 |
| TELᵉ | 35.7 |  |  | 0.59 | 123 | 35 | 18 | 5.9 | 37.3 |
| PELᵉ | 197 |  |  | 3.53 | 315 | 91.3 | 36 | 17 | 90 |

Values are given as min - max (mean). ᵃ(Caritat, 2011). b Effect Range Low (ERL) and Effect Range Medium (ERM) for fresh water ecosystems (Bai et al., 2011). ᶜToxicity Reference Value (TRV) (Mohiuddin et al., 2011). dWorld Surface Rock Average (WSA) (J.-M. Martin & Meybeck, 1979). eThreshold Effect Level (TEL) or Probable Effect Level (PEL) for freshwater ecosystems (MacDonald et al., 2000).

**Table 2.** Loadings of variables on principal components obtained from principal component analysis (PCA).

| **Sl No** | **Metal** | **PC1** | **PC2** | **PC3** | **Communality** |
| --- | --- | --- | --- | --- | --- |
| 1 | Cr | 0.397 | 0.058 | -0.258 | 0.228 |
| 2 | Cu | 0.424 | 0.077 | 0.317 | 0.286 |
| 3 | Cd | -0.01 | 0.61 | 0.171 | 0.401 |
| 4 | Pb | -0.032 | 0.623 | -0.266 | 0.46 |
| 5 | Zn | -0.199 | 0.33 | 0.497 | 0.396 |
| 6 | Ni | -0.452 | 0.127 | -0.036 | 0.222 |
| 7 | Mn | 0.365 | 0.269 | -0.13 | 0.222 |
| 8 | As | -0.286 | 0.158 | -0.629 | 0.502 |
| 9 | Co | 0.449 | 0.09 | 0.266 | 0.28 |

**Table 3.** Concentrations of selected metals (µg g⁻¹) in sediment samples from the eastern and western coasts of India.

| **Place** | **Cu** | **Co** | **Mn** | **Cd** | **Zn** | **Ni** | **Pb** | **As** | **Cr** | **Reference** |
| --- | --- | --- | --- | --- | --- | --- | --- | --- | --- | --- |
| West Bengal (frazerganj) | 11.98 - 23.20 (15.16) | 5.69 - 10.86 (7.6159) | 249.93 - 590.04 (352.61) | 0.80 - 1.36 (1.01) | 26.49 - 71.38 (36.88) | 12.92 - 25.60 (16.95) | 5.97 - 11.89 (7.90) | 4.40 - 7.99 (5.92) | 44.29 - 80.07 (58.10) | Present study |
| Ganga River | 2.1 - 73.98 (35.57) | - | 139 – 2167(1182) | .21 – 3.6 (1.6) | 6.3 – 104.3 (41.97) | 3.54 – 53.1 (25) | 2.1 – 36.5 (13.84) | - | 7.12 – 155.0 (64.54) | Ekabal and Pandey.,2019 |
| West Bengal (Gangasagar) | 11.60±0.59 | - | - | 0.17±0.03 | - | 19.08±2.46 | 7.09±0.11 | 5.47±0.14 | 21.20±1.11 | Blanca Antizar-Ladislao et al. 2015 |
| West Bengal Post Monsoon Estuary water (Gangasagar & lot 8) | 10.1–85.0 (40.1) | 4.8–33.6 (15.5) | 388–1182 (747) | 0.14–1.28 (0.50) | 17.97–168 (80.6) | 83.0–344 (194) | 22.1–68.0 (37.5) | 1.90–22.2 (8.75) | 22.4–166 (79.7) | Trifuoggi et al. 2022 |
| West Bengal Monsoon Estuary water (Gangasagar & lot 8) | 9.4–83.0  (22.40) | 3.9–30.0 ( 9.1) | 377–908 (516) | 0.14–1.26 (0.34) | 15.40–164 (43.1) | 87–365 (248) | 18.0–60.0 (28.7) | 1.76–28.3 (6.81) | 22.2–165 (50.8) | Trifuoggi et al. 2022 |
| West Bengal Pre Monsoon Estuary water (Gangasagar & lot 8) | 6.7–109 (30.9) | 3.4–42.1 (12.1) | 334–966 (576) | 0.13–1.56 (0.41) | 13.01–183 (56.1) | 72.0–413 (229) | 20.8–66.0 (32.8) | 1.33–19.0  (6.61) | 15.5–202 (59.9) | Trifuoggi et al. 2022 |
| West Bengal Estuary water (Gangasagar & lot 8) 2014-2017 | 22.4–40.1 (31.1) | 9.1–15.5 (12.2) | 516–747 (613) | 0.34-0.50 (0.42) | 43.1–80.6 (59.9) | 194–248 (224) | 28.7–37.5 (33.0) | 6.61-8.75 (7.41) | 50.8–79.7 (63.5) | Trifuoggi et al. 2022 |
| West Bengal Lot8 | 39.59 | 15.2 | 561.98 | - | 67.87 | 35.46 | - | 53.71 | 57.26 | Sarkar et al. 2017 |
| West Bengal Phuldubi | 34.87 | 14.45 | 590.67 | - | 67.77 | 31.48 | - | 51.11 | 55.42 | Sarkar et al. 2017 |
| West Bengal Gangasagar | 6.92 | 3.88 | 163.06 | - | 18.61 | 7.89 | - | 8.36 | 12.69 | Sarkar et al. 2017 |
| Odisha (Paradeep) | 5.34 - 19.85 (12.01) | 4.46 - 10.17 (7.13) | 277.48 - 491.11 (368.65) | 0.81 - 1.14 (0.97) | 15.22 - 32.89 (23.10) | 6.72 - 22.90 (14.90) | 5.69 - 12.14 (8.57) | 5.69 - 10.99 (7.99) | 43.63 - 92.71 (64.09) | Present Study |
| Odisha Dhamara Pre Monsoon | 7.60-29.21 (14.86) | - | 485.98-992.80 (733.21) | 0.75-1.39 (0.96) | 54.30-90.01 (68.94) | 50.73-91.82 (69.56) | 8.72-24.70 (15.35) | - | 44.67-91.57 (67.82) | Sahoo et al. 2023 |
| Odisha Dhamara Monsoon | 6.38-28.84 (12.77) | - | 405.32-750.61 (556.80) | 0.47-1.00 (0.67) | 35.80-95.34 (63.48) | 56.66-100.70 (75.43) | 2.93-15.00 (6.52) | - | 72.63-127.83 (96.46) | Sahoo et al. 2023 |
| Odisha Dhamara Post Monsoon | 8.13-33.32 (16.19) | - | 400.51-719.28 (544.50) | 0.81-1.38 (0.95) | 52.49-96.32 (70.07) | 28.90-79.55 (46.87) | 5.89-17.21 (10.58) | - | 72.90-119.35 (96.18) | Sahoo et al. 2023 |
| Odisha Paradeep Pre Monsoon | 38.28-150.67 (72.50) | - | 2248.6-5902.94 (3700.29) | 0.89-1.47 (1.03) | 157.94-534.43 (303.42) | 66.23-263.42 (130.59) | 74.05-244.48 (137.84) | - | 245.64-639.87 (406.07) | Sahoo et al. 2023 |
| Odisha Paradeep Monsoon | 21.64-118.53 (53.26) | - | 1437.80-5194.38 (2692.86) | 0.45-1.22(0.74) | 122.76-397.93 (221.14) | 38.87-257.29 (96.95) | 63.93-246.58 (130.79) | - | 140.08-541.79 (300.37) | Sahoo et al. 2023 |
| Odisha Paradeep Post Monsoon | 21.14-99.52 (48.79) | - | 1667.08-4470.70 (2457.39) | 0.55-1.02 (0.74) | 111.25-314.31 (201.49) | 45.23-199.50 (87.39) | 57.20-218.10 (120.75) | - | 142.49-422.73 (272.56) | Sahoo et al. 2023 |
| Odisha Mahanadi estuary Pre monsoon | 1.78–2.98 (2.38) | 3.65-5.84(4.70) | - | 0.01-0.49 (0.26) | 8.24-14.50 (11.39) | 0.04-3.53 (1.00) | 17.83-22.97 (20.61) | - | 12.74-16.72 (14.49) | Swain et al. 2021 |
| Odisha Mahanadi estuary monsoon | 1.09-6.44 (1.92) | 1.67-3.80 (2.81) | - | 0.80-1.88 (1.50) | 4.55-14.89 (10.43) | 1.49-2.28 (1.81) | 16.21-27.29 (23.94) | - | 17.95-26.56 (23.51) | Swain et al. 2021 |
| Odisha Mahanadi estuary Post monsoon | 0.93-5.85 (2.76) | 0.73-4.73 (2.52) | - | 0.35-0.56 (0.45) | 4.29-16.47 (10.98) | 1.50-7.57 (3.34) | 9.50-23.76 (15.69) | - | 2.98-23.58 (12.87) | Swain et al. 2021 |
| Andhra Pradesh (Vishakhapatnam) | 6.73 - 21.02 (13.45) | 5.00 - 8.60 (6.80) | 145.15 - 352.86 (252.00) | 0.90 - 5.05 (2.01) | 15.99 - 45.09 (29.36) | 6.57 - 17.09 (11.59) | 3.73 - 12.49 (6.82) | 3.80-7.27 (5.62) | 27.73 - 72.36 (50.65) | Present Study |
| Andhra Pradesh vishakhapatnam | 74 | 49 | - | 1.9 | 591 | 68 | 61 | - | 156 | Mohammad et al. 2021 |
| Kerala (Cochin estuary) | 4.11 - 25.04 (13.68) | 3.52 - 9.19 (6.35) | 56.70 - 155.78 (107.50) | 2.14 - 6.65 (3.97) | 34.78 - 261.85 (92.77) | 10.43 - 34.24 (23.40) | 6.10 - 36.00 (19.08) | 2.76 - 8.63 (6.50) | 25.40 - 95.07 (63.62) | Present Study |
| Kerala Vembanad Lake Dry season | 4.6–54.6 (31.5) | 7.4–36.6 (19.3) | 93–1,086 (440.7) | 0.07–10.5 (1.9) | 29.8–973.7 (208.8) | 9.0 - 78.5 (48.2) | 17.3–46.7 (35.3) | - | 20.7–185.7 (110.7) | Selvam et al. 2011 |
| Kerala Vembanad Lake wet season | 6.6–59.2(30.9) | 5.4–40.7 (18.6) | 124–1,016 (461.9) | 0.07–10.1 (1.7) | 44.2–848.4 (184.5) | 8.0 to 79.0 (48.7) | 18.5–46.8 (32.6) | - | 27.0–200.9 (107.5) | Selvam et al. 2011 |
| Kerala Vembanad Lake | 13.97–53.02 | - | - | 0.61–23.9 | 62.74–1800.1 | - | 3.04–33.86 | - | - | Sruthi et al. 2018 |
| Keral Vembanad Lake North Pre-monsoon | 3.9-85.3 (32.7) | - | - | 0.1-18.4 (5.1) | 36.1-425.1 (148.6) | - | 2.1-80.6 (36.0) | - | 240.0-593.0 (401.5) | Joseph et al. 2025 |
| Keral Vembanad Lake North ( Post-monsoon | 9.4-91.5 (43.1) | - | - | 0.2-21.4 (6.9) | 15.9-509.0 (134.9) | - | 3.8-90.7  (36.1) | - | 185.0-630.0 (417.8) | Joseph et al. 2025 |
| Karnataka (Mangalore) | 1.73 - 10.35 (4.95) | 2.05 - 5.85 (3.1905) | 19.97 - 105.71 (44.20) | 1.49 - 2.87 (2.00) | 4.79 - 19.06 (10.49) | 4.59 - 20.29 (9.59) | 0.39 - 13.28 (4.37) | 1.50 - 4.03 (2.21) | 13.40 - 84.83 (44.15) | Present Study |
| Karnataka Mangalore North-east monsoon (Alappuzha , Kochi, Calicut, Payannur, Mangalore) | 18.2 ± 11.2 | 12.5 ± 4.8 | 217 ± 74.7 | 1.4 ± 0.4 | 39 ± 16.8 | 67.6 ± 32.6 | 31 ± 8.1 | - | 165 ± 107.0 | Cyriac et al. 2021 |
| Karnataka Mangalore South-west monsoon (Alappuzha, Kochi, Calicut, Payannur, Mangalore) | 18.2 ± 11.8 | 13.5 ± 8.8 | 219 ± 120 | 1.5 ± 0.7 | 38 ± 26.3 | 65.9 ± 40 | 27.6 ± 8.5 | - | 152 ± 126 | Cyriac et al. 2021 |
| Goa (Mandovi estuary) | 16.8-32.9 (28.11) | 7.5-11.93 (10.69) | 376.9-1233.5 (709.5) | 1.26-1.49 (1.37) | 27.76-65.6 (45.2) | 18.3-37.9 (31.2) | 4.26-6.8 (6.11) | 5.6-9.85 (8.18) | 122.6-280.8(178.5) | Present Study |
| Goa Mandovi estuary (Diwar Island) | 57.23 | 21.7 | 1244 | - | 57.7 | - | 22.8 | - | 145.89 | Veerasingam et al. 2015 |
| Goa Mandovi estuary (Old Goa) | 45.51 | 29.09 | 1842 | - | 71.03 | - | 28.06 | - | 150.42 | Veerasingam et al. 2015 |
| Goa Mandovi estuary (Chorao Island) | 39.23 | 22.45 | 1539 | - | 71.15 | - | 22.62 | - | 146.93 | Veerasingam et al. 2015 |
| Goa Mandovi estuary (Monsoon) | 21.65 - 52.20 | - | 34.00 - 213.23 | - | 98.32 - 172.57 | - | 74.33 - 98.57 | - | 197.40 - 341.54 | Gaonkar et al. 2021 |
| Goa Mandovi estuary (Pre-Monsoon) | 20.65 - 62.10 | - | 34.83 - 113.03 | - | 57.33 - 115.41 | - | 35.00 - 93.41 | - | 204.48 - 438.37 | Gaonkar et al. 2021 |
| Goa Mandovi estuary (Post-Monsoon) | 21.65 - 67.43 | - | 38.41 - 103.66 | - | 53.91 - 136.81 | - | 46.25 - 93.16 | - | 171.48 - 500.78 | Gaonkar et al. 2021 |
| Mahashrata (Mumbai, Colaba, Sassoon dock) | 51.50 - 78.32 (66.46) | 13.95 - 19.52 (17.30) | 376.75 - 531.96 (474.74) | 1.43 - 3.88 (2.04) | 48.08 -76.79 (62.96) | 33.39 - 45.33 (38.83) | 5.92 - 8.89 (6.88) | 6.29 - 7.79 (6.89) | 115.23 - 156.83 (137.33) | Present Study |
| Mumbai Thane Creek | 202–275 (227) | 31.50–66.75 (44.92) | 1653–2518 (2025) | - | 109–200 (139) | - | 71–92 (81.50) | - | 175–227 (201) | Fernandes et al. 2014 |
| Mumbai Ulhas Estuary | 206–345 (264) | 92–139 (109) | 1545–2626 (1902) | - | 91–222 (133) | - | 46–195 (95) | - | 225–523 (307) | Fernandes et al. 2014 |
| Mumbai C1(<25 µm) | 83.5 | 43.3 | 1112 | - | 116.3 | 125 | 20.7 | - | 342.7 | Lonkar et al. 2022 |
| Mumbai C1(>25-63 µm) | 104.4 | 36.9 | 938.1 | - | 117.9 | 74.1 | 17.5 | - | 156.3 | Lonkar et al. 2022 |
| Mumbai C1(>63 µm) | 101.6 | 36.8 | 884.2 | - | 124.3 | 79.3 | 38.4 | - | 160.1 | Lonkar et al. 2022 |
| Mumbai C1(Bulk sediment) | 82.4 | 32.9 | 845 | - | 98.4 | 72.5 | 14.3 | - | 137 | Lonkar et al. 2022 |
| Mumbai C2(<25 µm) | 131.5 | 24.8 | 916.5 | - | 82 | 58.6 | 21.8 | - | 135.4 | Lonkar et al. 2022 |
| Mumbai C2(>25-63 µm) | 91.5 | 30.7 | 900.5 | - | 108.3 | 59.9 | 12.9 | - | 131.3 | Lonkar et al. 2022 |
| Mumbai C2(>63 µm) | 109.1 | 37.1 | 857.8 | - | 141.9 | 75.4 | 22.3 | - | 155.7 | Lonkar et al. 2022 |
| Mumbai C2 (Bulk sediment) | 81.7 | 32.4 | 917 | - | 95.3 | 67.6 | 15.1 | - | 129 | Lonkar et al. 2022 |
| Gujarat (Hazira) | 40.59 - 63.44 (50.20) | 14.56 - 17.87 (16.24) | 488.47 - 1235.83 (667.6889) | 1.39 - 2.49 (1.67) | 47.66 - 417.68 (137.34) | 19.19 - 29.80 (23.80) | 3.74 - 7.60 (4.70) | 2.96 - 6.39 (4.67) | 60.15 - 98.21 (74.30) | Present Study |
| Gujarat Hazira Tapti Estuary, Surat Min | 123.17 - 170.52 (148.32) | 14.73 – 21.69 (18.34) | - | 0.74 – 1.25 (0.83) | 117.4 – 178.8 (143.55) | 71.13 – 107.82 (80.92) | 43.28 – 77.74 (56.69) | - | 48.26 -72.4 (55.2) | Shah et al.2012 |
| Gujarat Bhavnagar coast, Gulf of Khambhat | 0.7-12.7 (5.2) | 1.3-8.4 (2.7) | 21.8-120.5 (58.9) | 0.1-0.8 (0.3) | 2.7-42.7 (12.5) | 1.3-14.7 (7) | 2.1-13.5 (8.2) | - | 10.6-98.4 (42.0) | Gosai et al,2024 |
| Gujarat Gulf of Kutch | 4.90-123.50 (32.36) | 0.10-22.80 (7.22) | 210.9-1034.0 (639.62) | 0.01-0.40 (0.24) | 13.10-99.50 (59.88) | 0.50-66.90 (39.24) | 0.10-0.50 (0.40) | 0.50-10.90 (4.25) | 32.70-134.50 (96.61) | Dudiya et al.2025 |
