# Supplementary material
Source: Research Square preprint supplement (doi:10.21203/rs.3.rs-8601712/v1)
Supplement: Supplementary file 2 [file d28158f4fc7d4ada1a3fb607.docx]

**Supplementary Table:**

**Table S1.** Eigenvalues and percentage of variance explained by each principal component obtained from principal component analysis (PCA).

| **Sl No** | **PC** | **igenvalue** | **Variance Percent** | **Cumulative Variance** |
| --- | --- | --- | --- | --- |
| 1 | PC1 | 4.175 | 46.39 | 46.39 |
| 2 | PC2 | 1.994 | 22.16 | 68.55 |
| 3 | PC3 | 1.187 | 13.19 | 81.74 |
| 4 | PC4 | 0.645 | 7.16 | 88.91 |
| 5 | PC5 | 0.405 | 4.49 | 93.4 |
| 6 | PC6 | 0.304 | 3.38 | 96.78 |
| 7 | PC7 | 0.206 | 2.29 | 99.07 |
| 8 | PC8 | 0.065 | 0.72 | 99.79 |
| 9 | PC9 | 0.019 | 0.21 | 100 |

**Supplementary Figures**
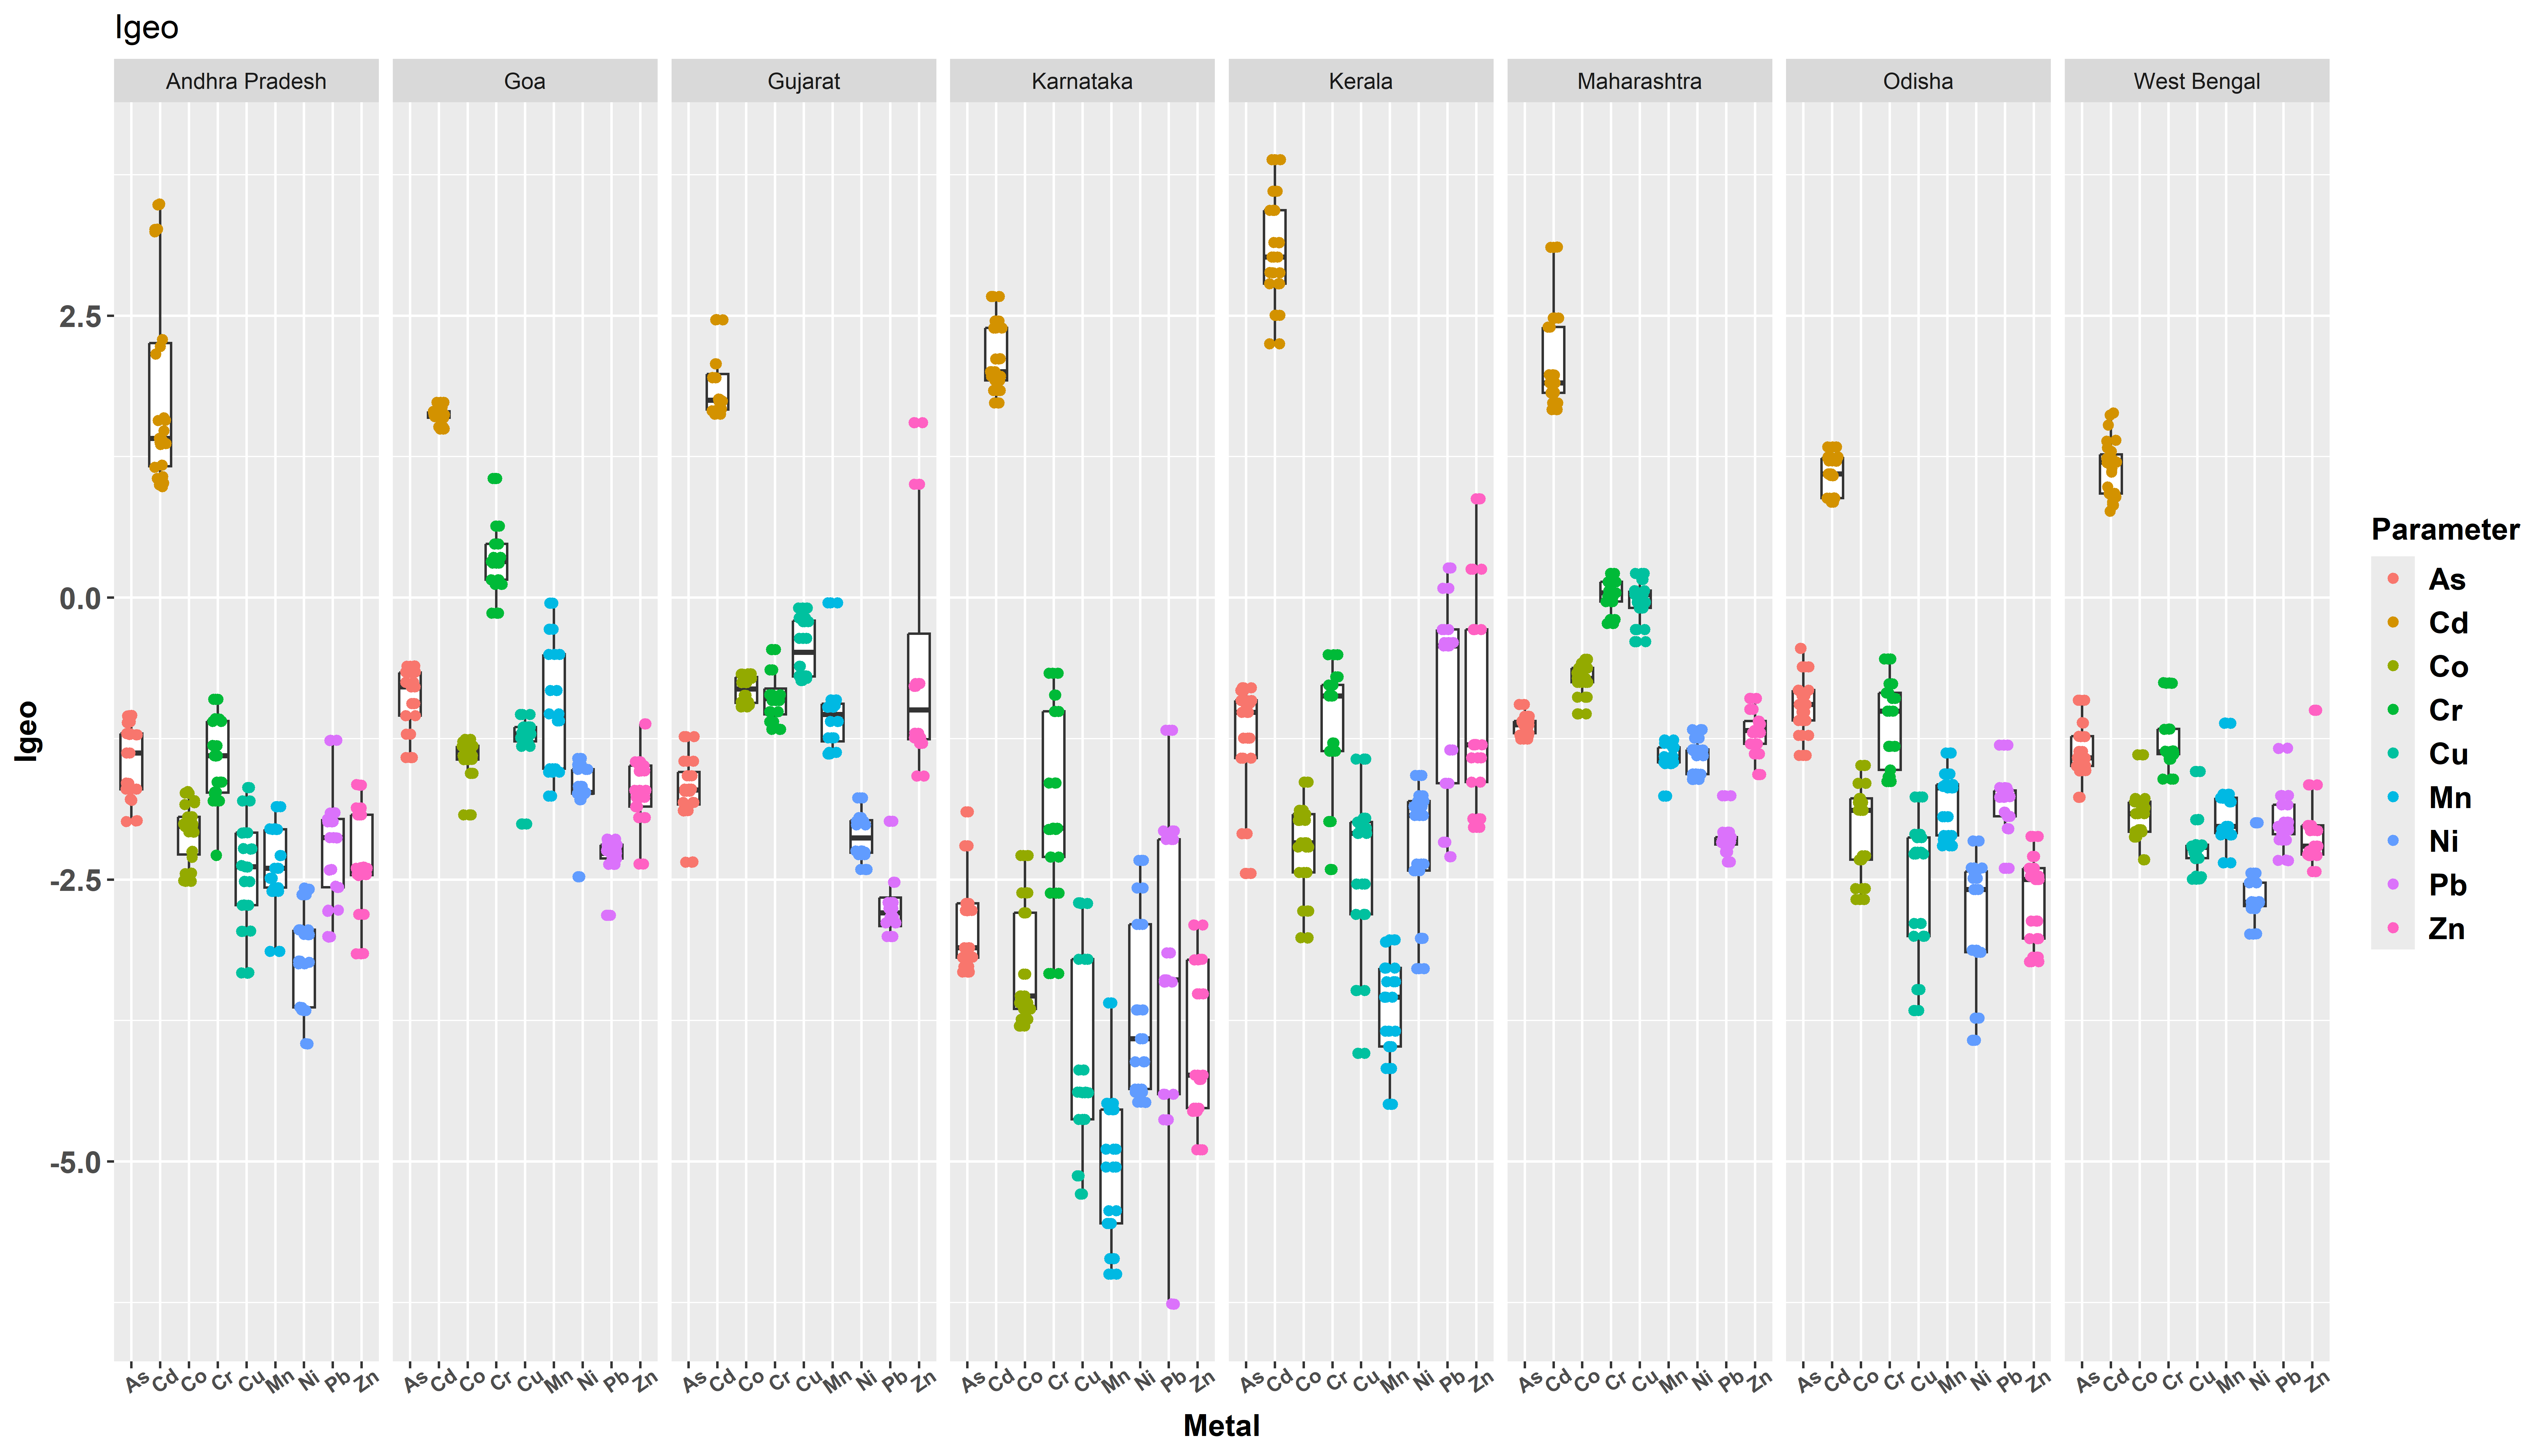
**:**


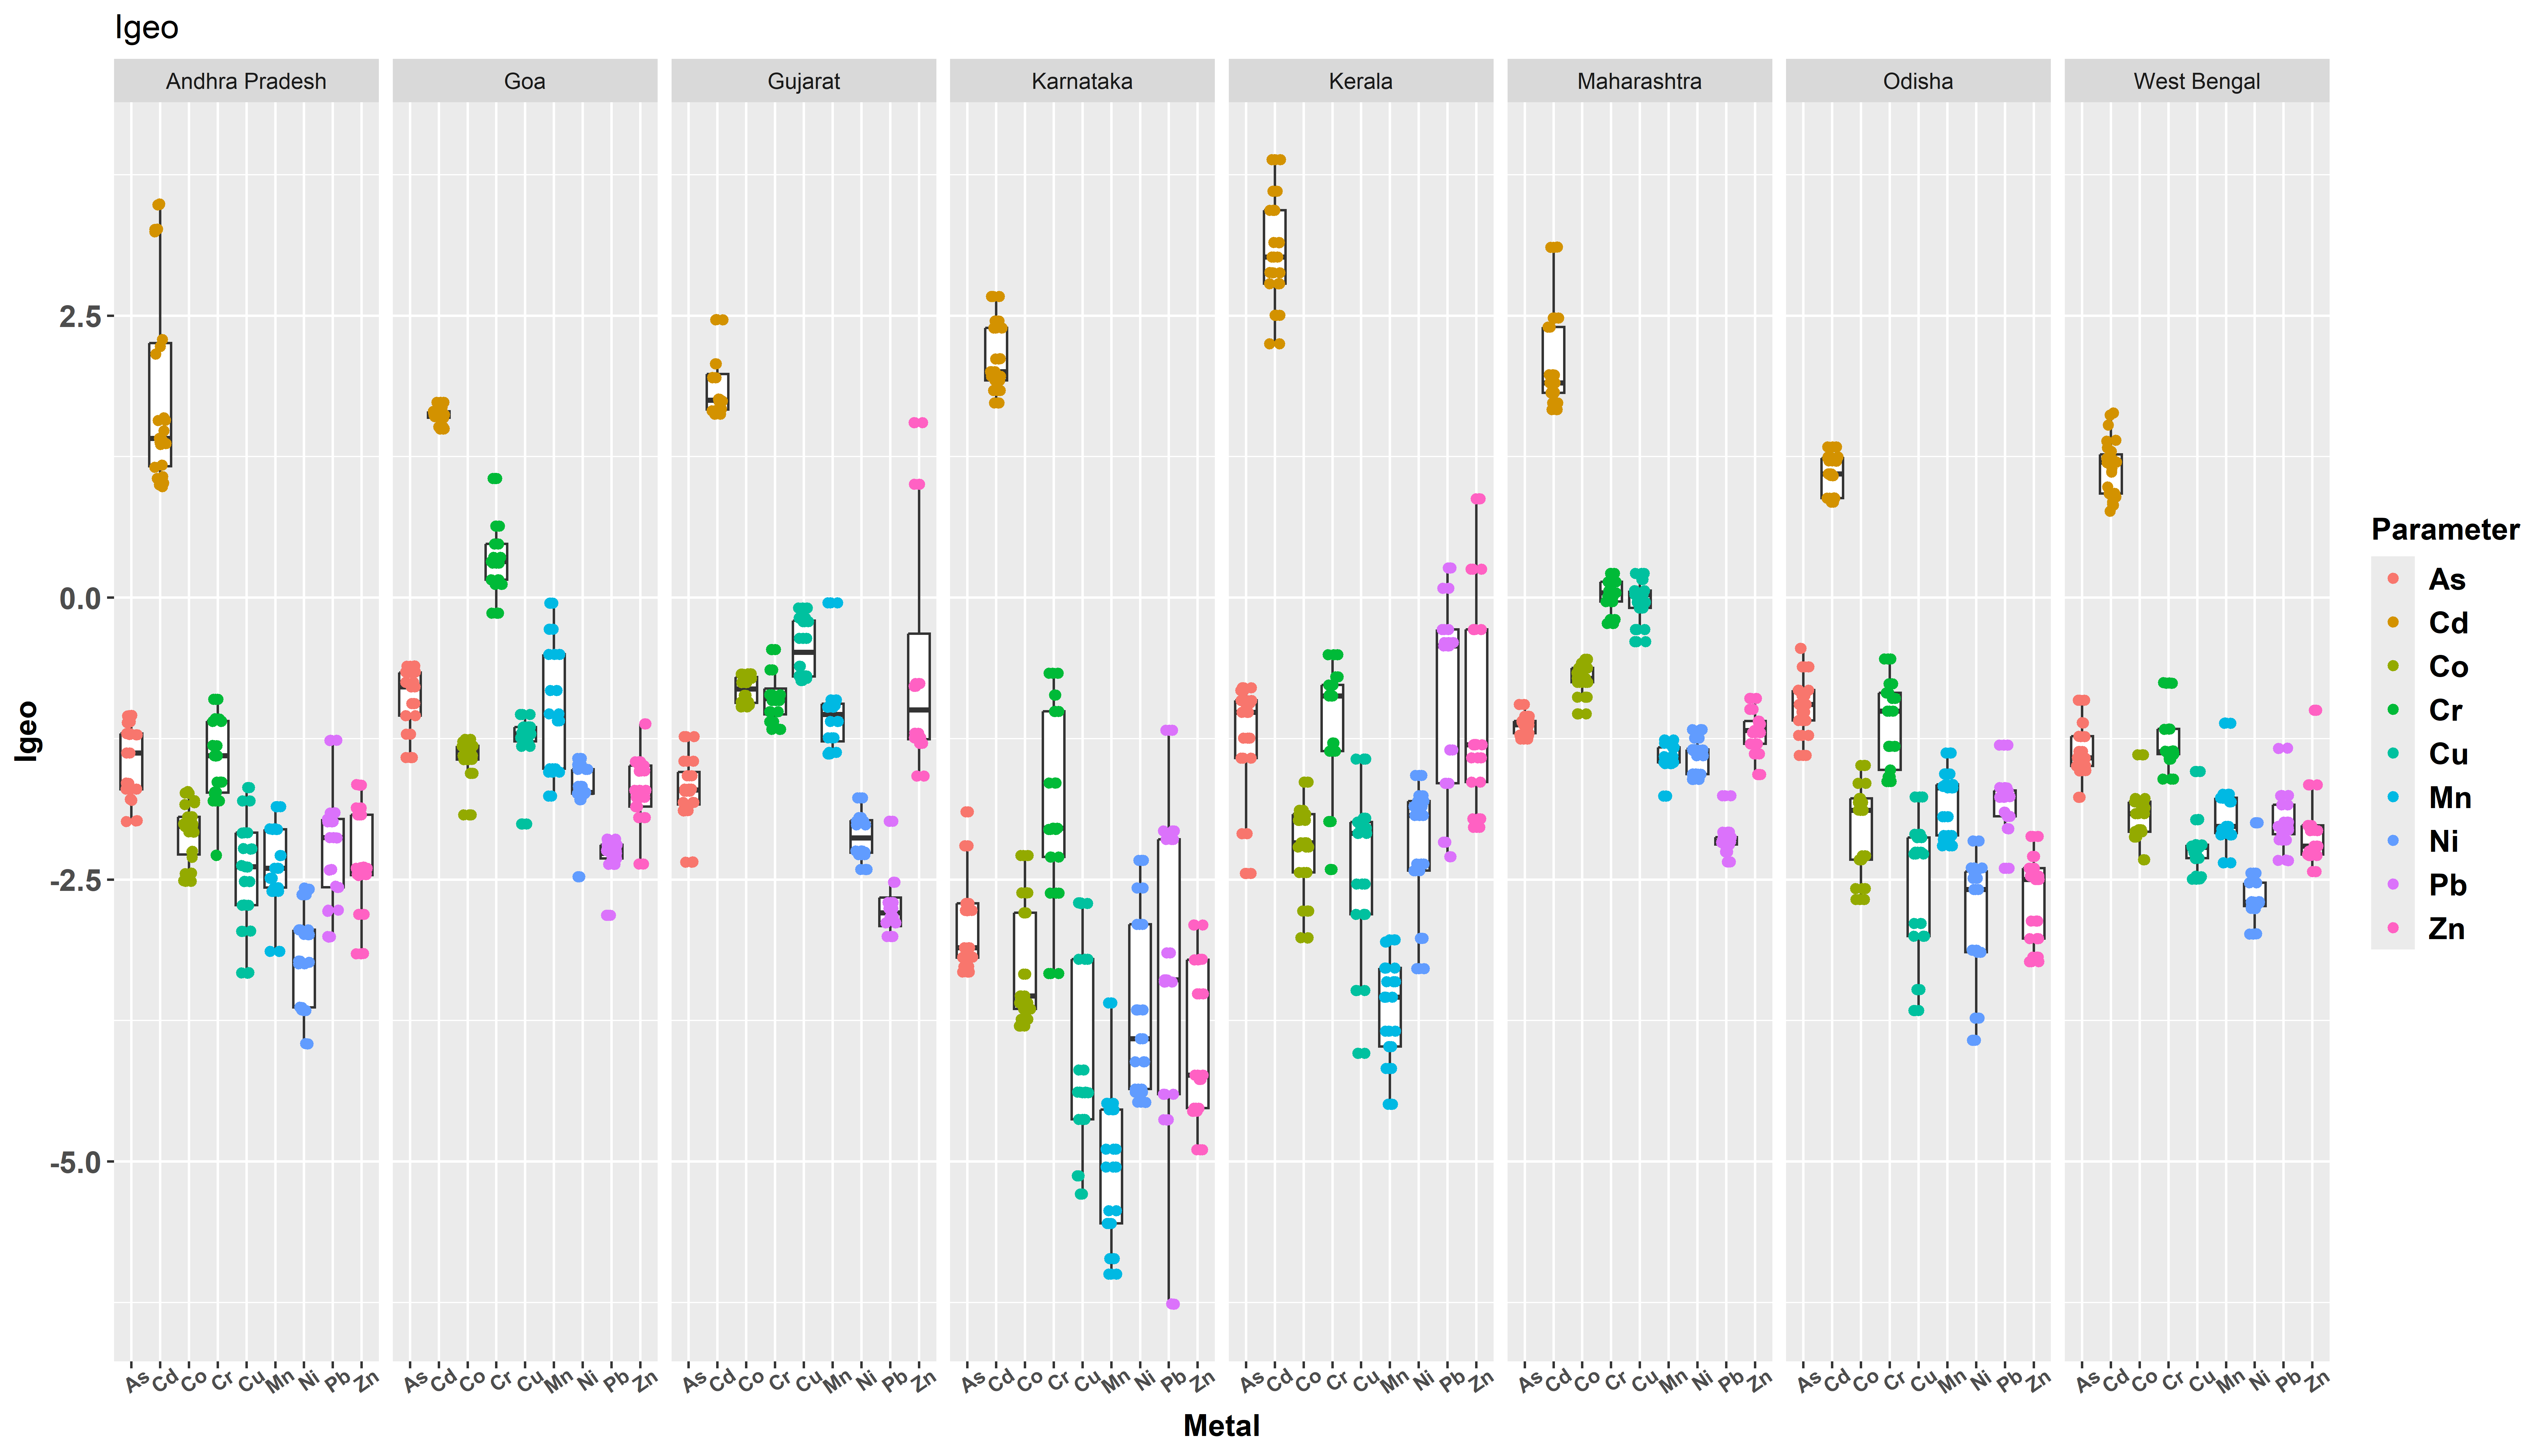


**Fig S1:** Spatial distribution and variability of the geoaccumulation index (Igeo) across and within the sampling locations.


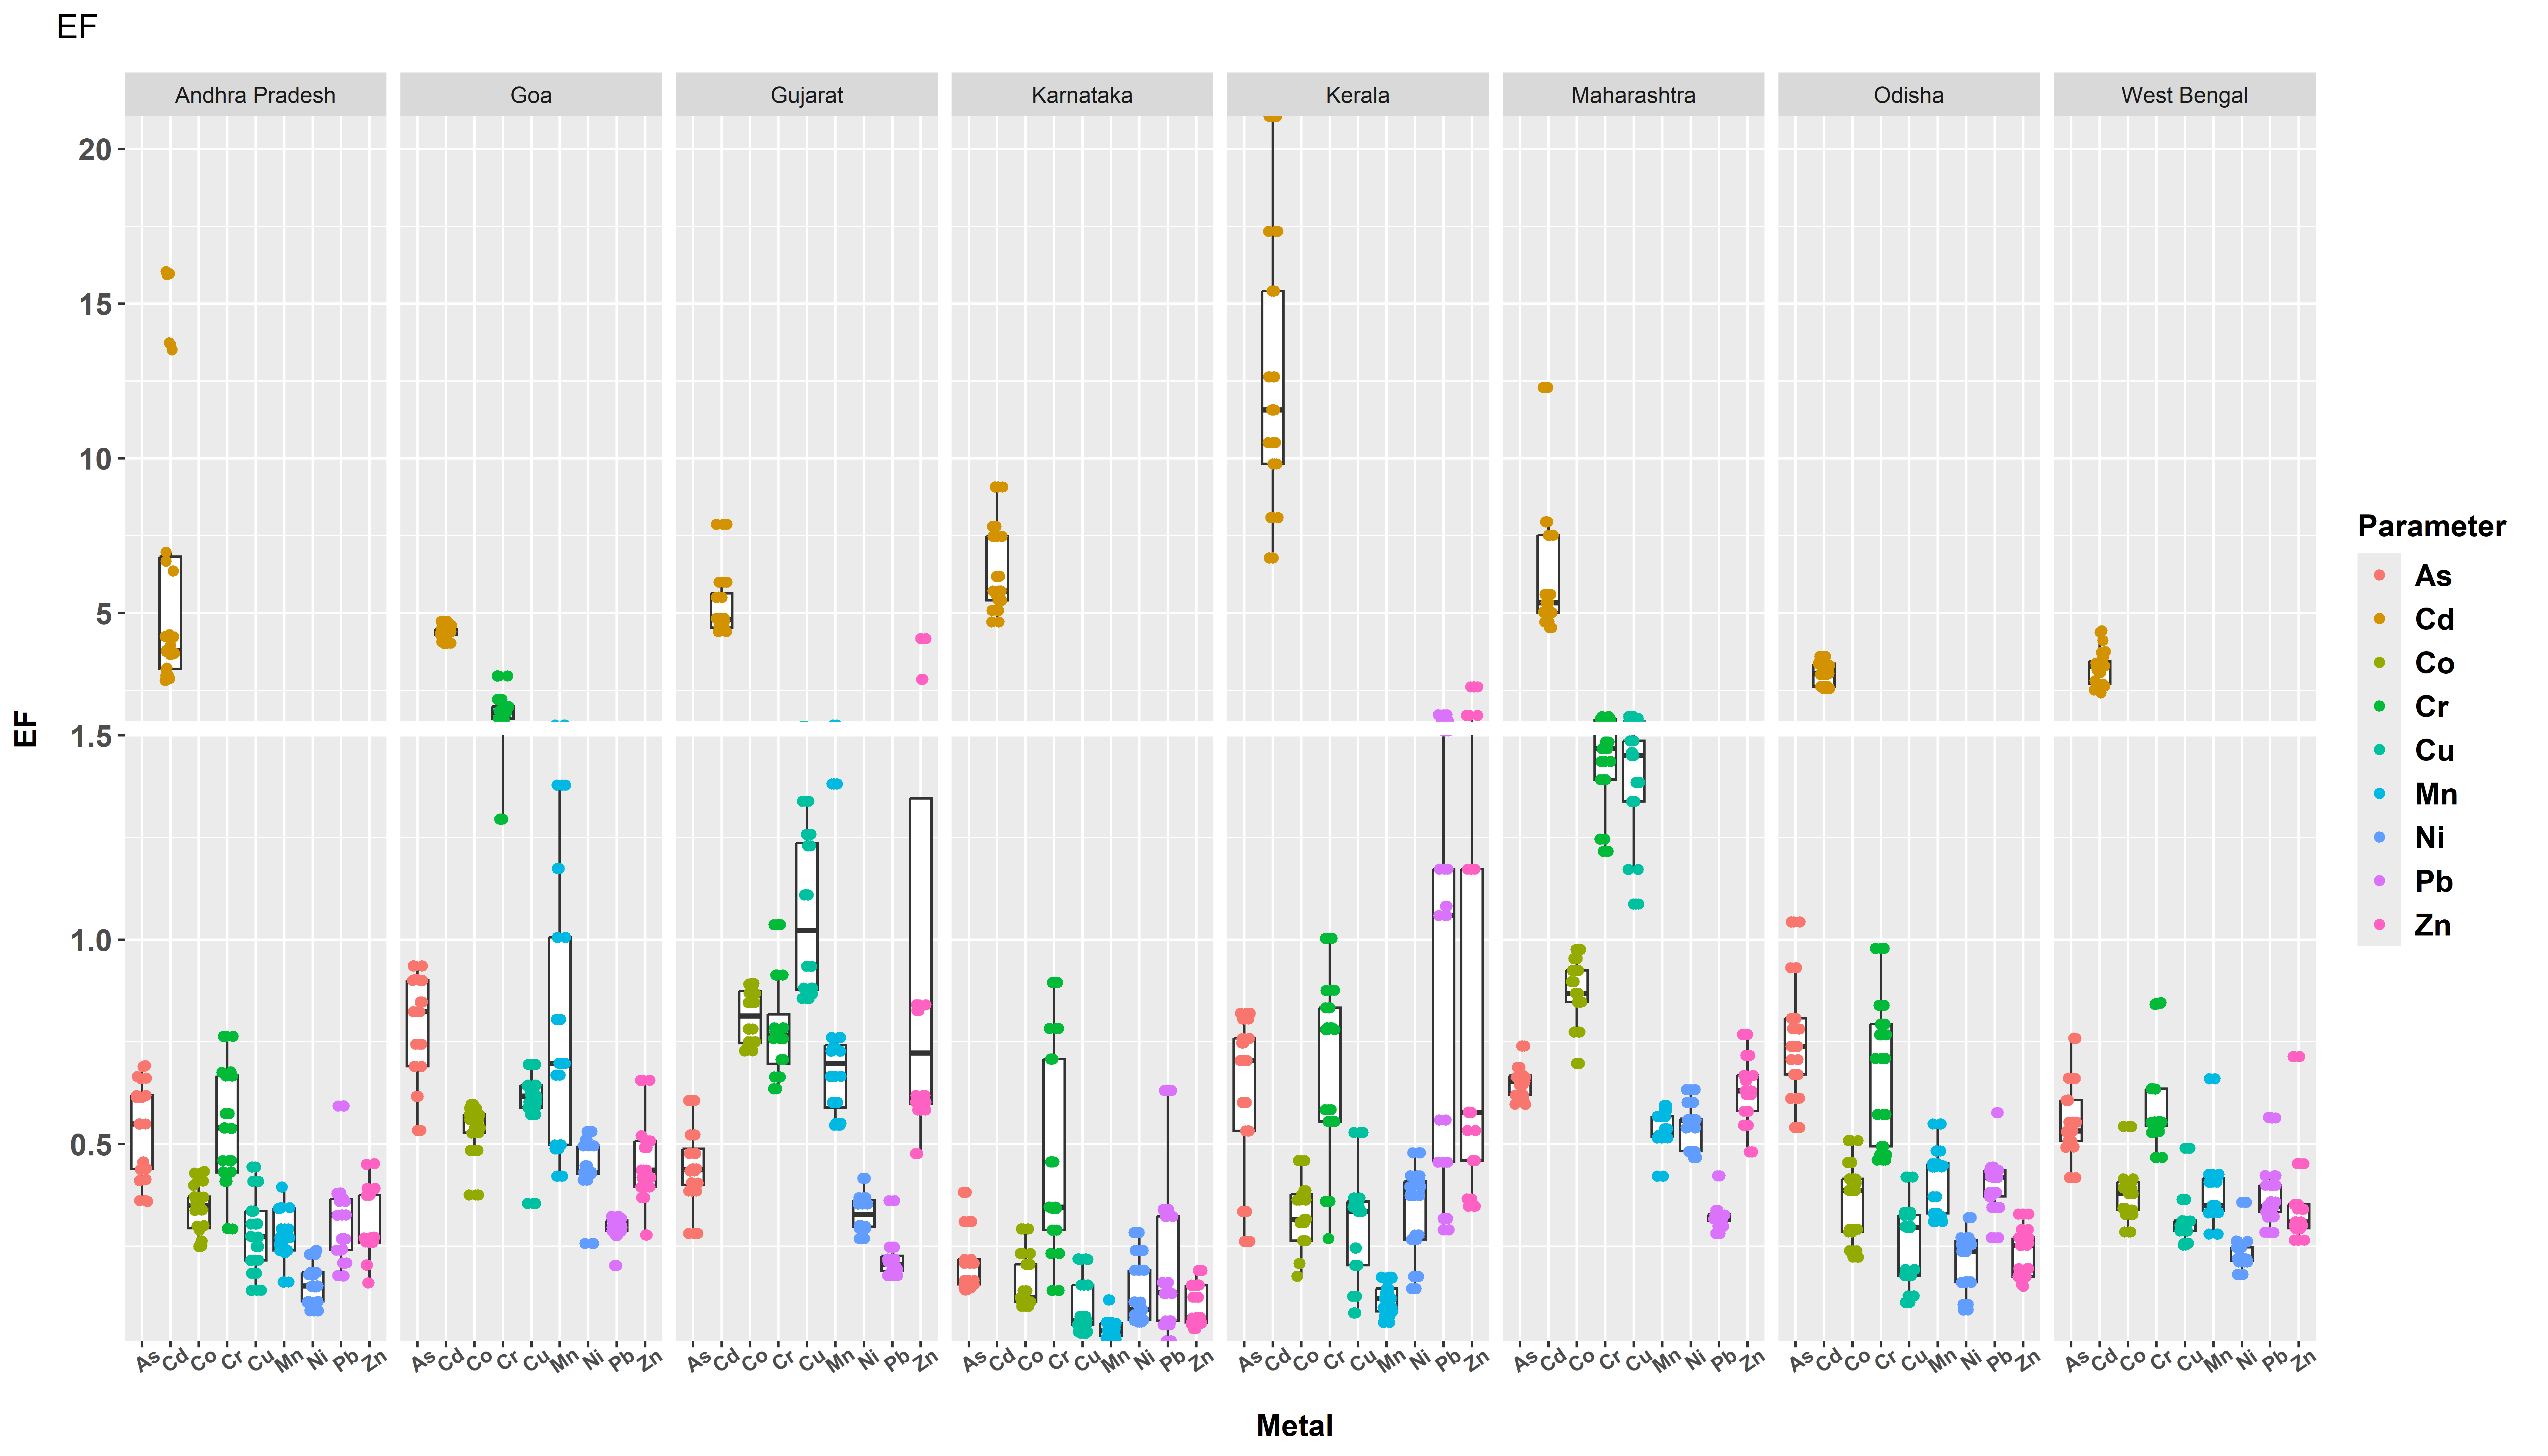


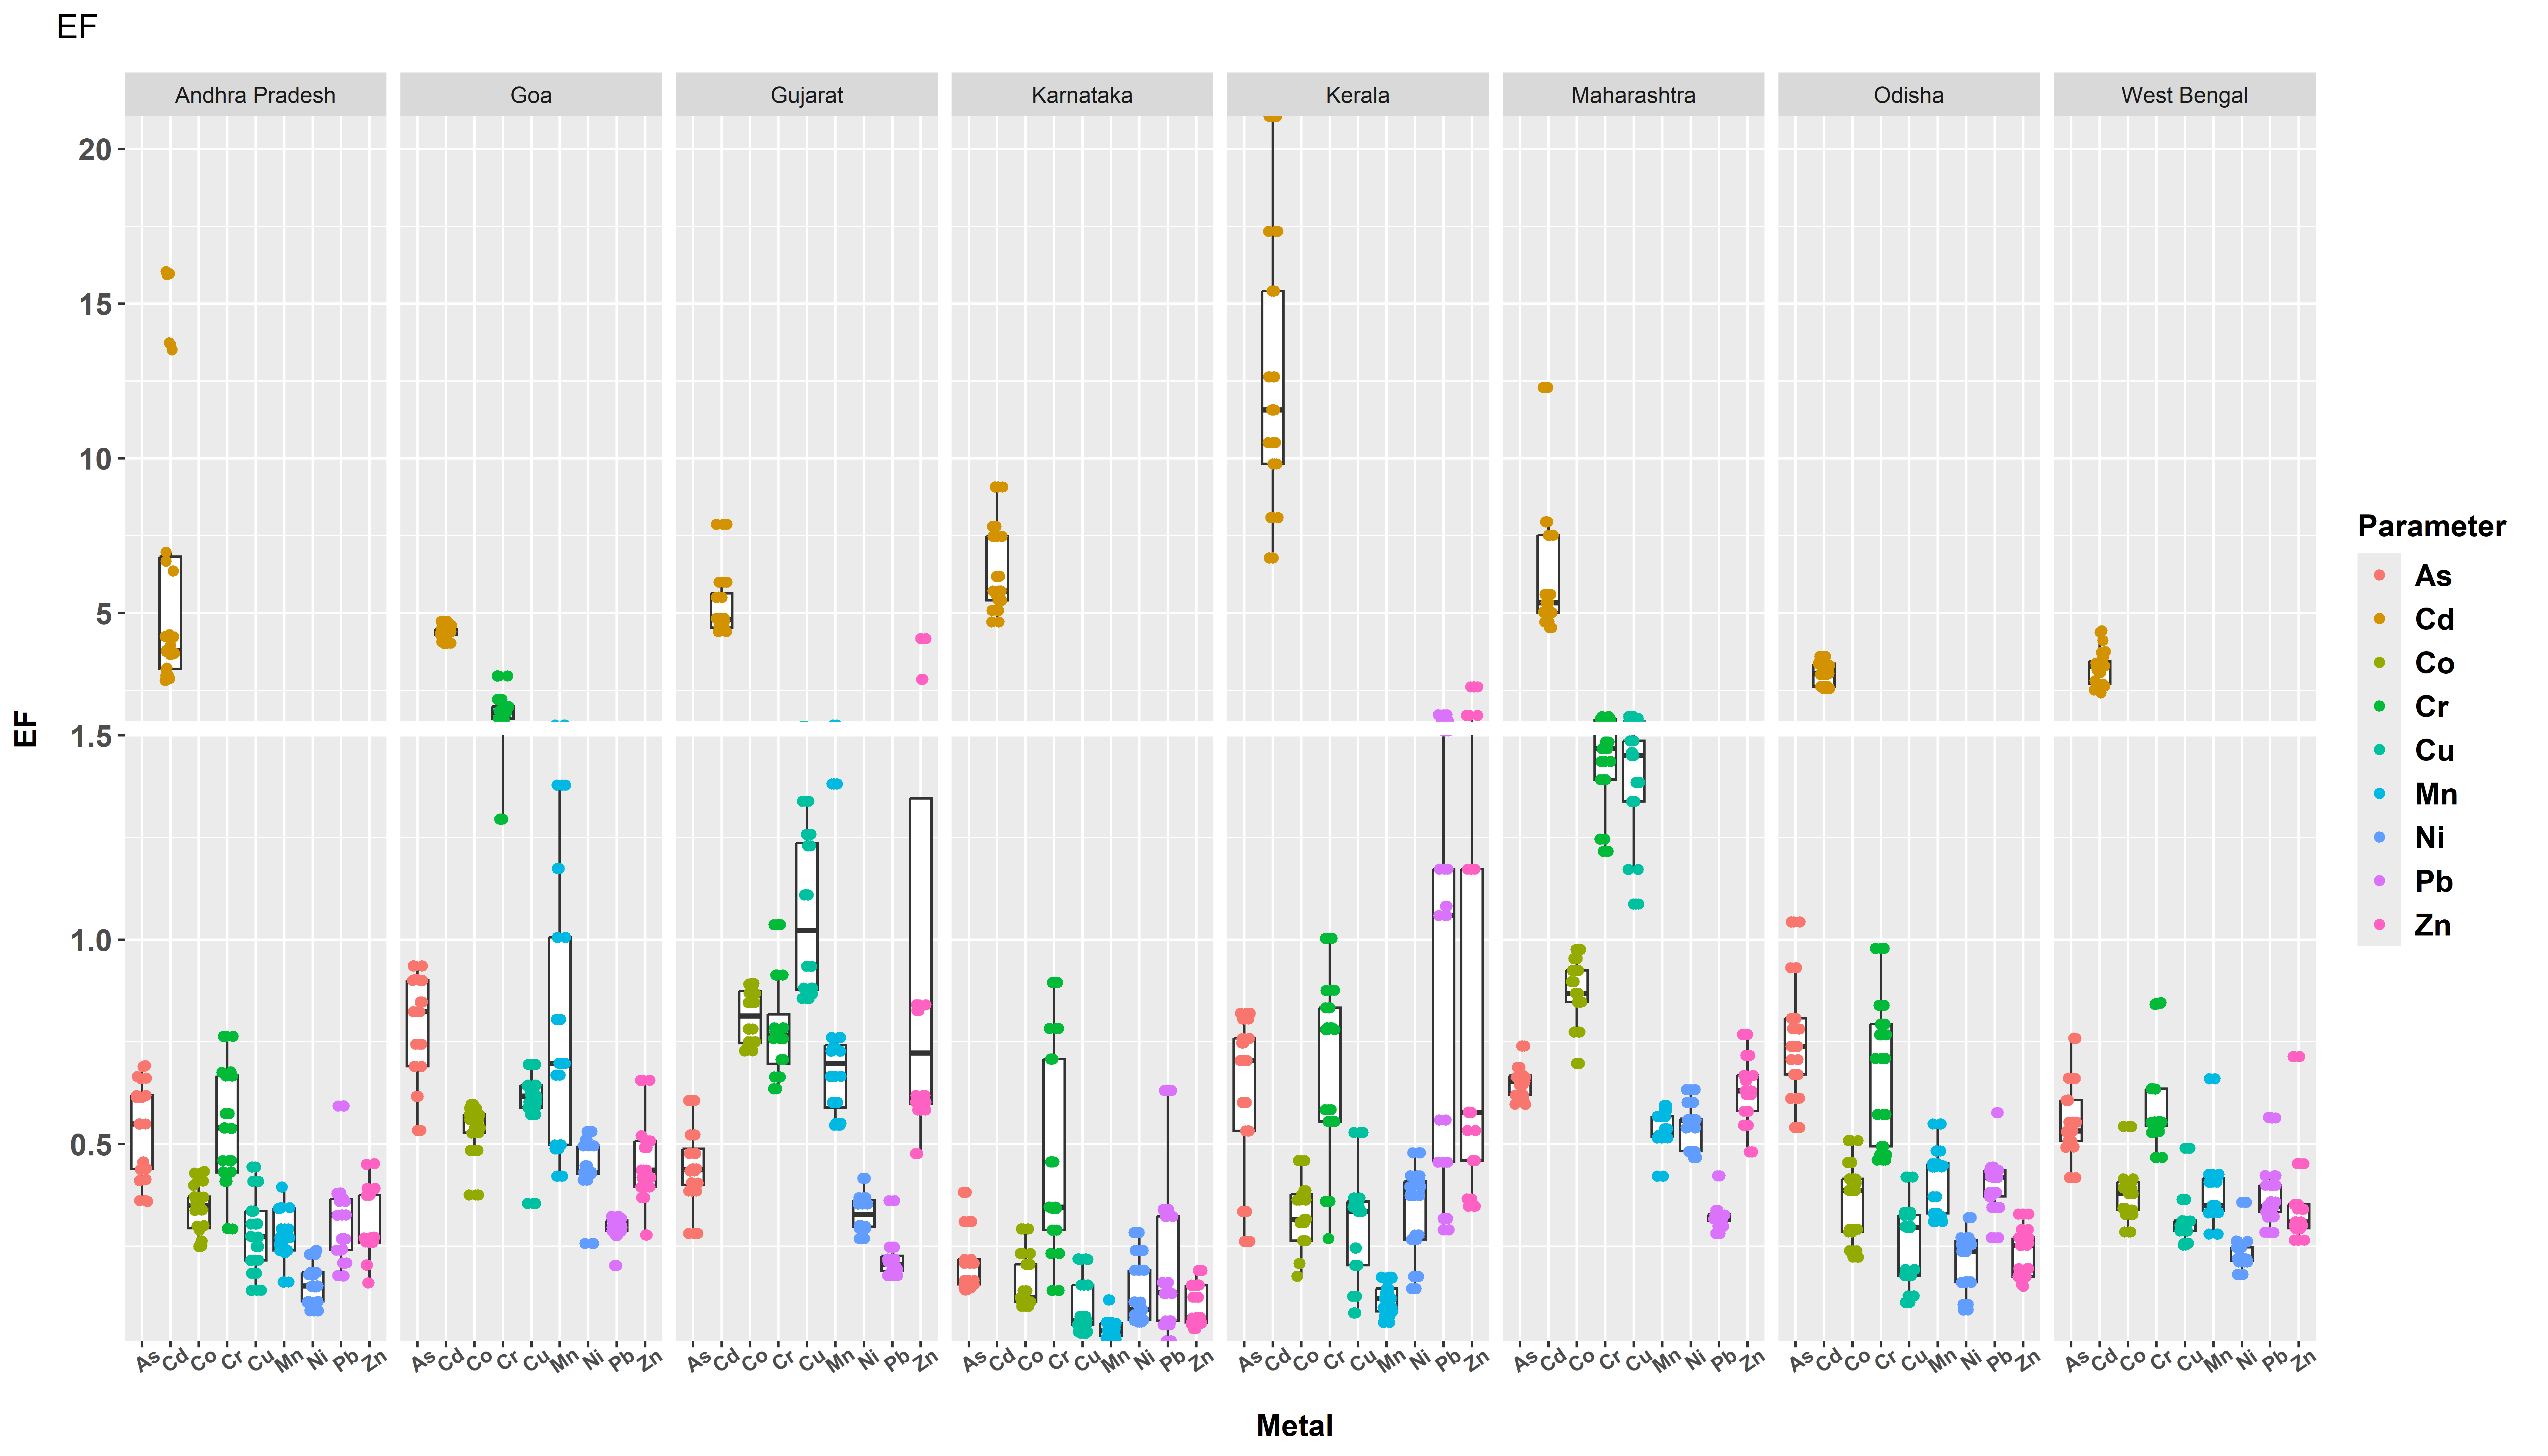


**Fig S2:** Distribution and variations of Enrichment Factor between and within the sampling locations.


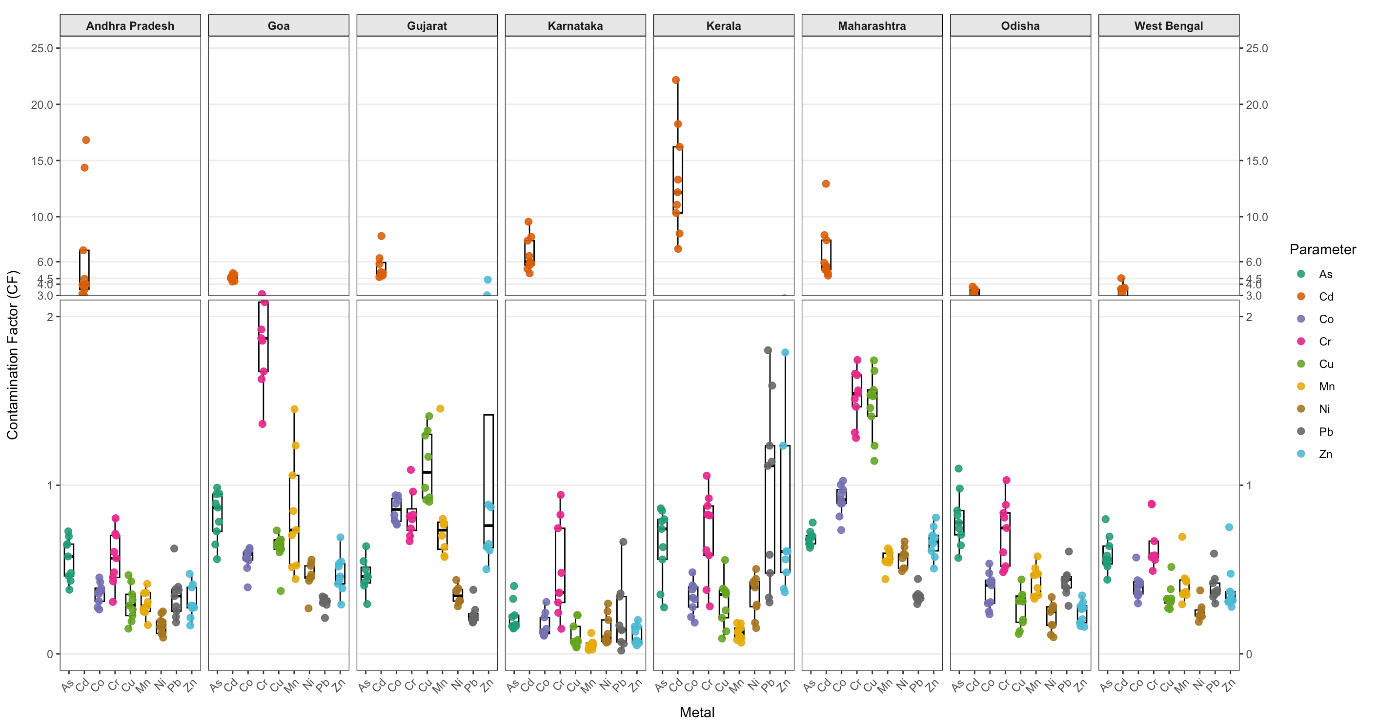


**Fig S3:** Distribution and variations of contamination Factor between and within the sampling locations.
